# Supplementary material for: Comparing the Attitude toward the COVID-19 and the 2020/21 and 2019/20 Flu Vaccination Campaigns among Italian Healthcare Workers
Source: MDPI journal article supplement (doi:10.3390/vaccines9111312), 2021-11-11
Supplement: s1 [file s1]

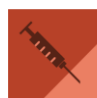**Supplementary S1.** List of conditions ever specified by the participants on the three questionnaires.

|                                  |                                                                                                                                                                                                                                                                                                                                                                                                                                                                                                                              |
|----------------------------------|------------------------------------------------------------------------------------------------------------------------------------------------------------------------------------------------------------------------------------------------------------------------------------------------------------------------------------------------------------------------------------------------------------------------------------------------------------------------------------------------------------------------------|
| Allergies                        |                                                                                                                                                                                                                                                                                                                                                                                                                                                                                                                              |
| Other than Drugs/Unspecified     | Mites, Animal Fur, Grasses, Pollen, Olive, Foods, Cosmetics, Nickel, Thimerosal                                                                                                                                                                                                                                                                                                                                                                                                                                              |
| Antibiotics                      | Penicillin, Macrolides, Sulfonamides                                                                                                                                                                                                                                                                                                                                                                                                                                                                                         |
| NSAIDs                           | NA                                                                                                                                                                                                                                                                                                                                                                                                                                                                                                                           |
| Other Drugs                      | Steroids, Paracetamol, Muscle Relaxant, Anesthetics                                                                                                                                                                                                                                                                                                                                                                                                                                                                          |
| Chronic diseases                 | Hypothyroidism/thyroiditis, type 2 diabetes, osteoporosis, hypertension, myocardial infarction, congenital tachycardia, hypercholesterolaemia, heart valve disease, cardiopathy, aortic aneurism, colitis, UC, GERD, CD, megacolon, HCV, anxiety/depression, fibromyalgia, psoriasis, hemiparesis, abdominal adherence, essential thrombocythemia, renal dysplasia, MEN2A mutation, chorioretinopathy, polyneuropathy, Charcot–Marie–Tooth polyneuropathy, MS, angioedema, narrowing of the vertebral canal, osteochondritis |
| Malignancies                     | Breast cancer, colorectal cancer, thyroid cancer, Kaposi sarcoma, dermatofibrosarcoma                                                                                                                                                                                                                                                                                                                                                                                                                                        |
| Surgery                          | Caesarian section, appendectomy, tonsillectomy, gastrectomy, mastectomy, thyroidectomy, aortic aneurism, nevus removal, ovarian cysts removal, gynecological surgery, eyes surgery, liposuction, aesthetic surgery                                                                                                                                                                                                                                                                                                           |
| Previous vaccinations            | DTP, HPV, flu                                                                                                                                                                                                                                                                                                                                                                                                                                                                                                                |
| Adverse reaction to vaccinations | Urticarial rashes to measles vaccination; serious adverse event to pertussis vaccination in early childhood                                                                                                                                                                                                                                                                                                                                                                                                                  |
| Any possible notes               | Allergies, chronic diseases, malignancies, use of medications, surgery, head injury, reaction to previous vaccines, history of COVID–19 infection, specification of first time to be vaccinated (for flu)                                                                                                                                                                                                                                                                                                                    |

NA= not applicable; UC= ulcerative colitis; GERD= gastroesophageal reflux disease; CD= celiac disease; MS=Multiple Sclerosis; DTP= Diphtheria–Tetanus–Pertussis.

**Supplementary S2.** Odds ratios for discordance in reporting between 2020 flu and 2019 flu questionnaires (reference category: concordant reports).

| Characteristics         | Positive at 2020 flu, Negative at 2019 Flu<br>OR, 95% CI | Negative at 2020 Flu, Positive at 2019 Flu<br>OR, 95% CI |
|-------------------------|----------------------------------------------------------|----------------------------------------------------------|
| <b>Allergies</b>        |                                                          |                                                          |
| Age (years)             |                                                          |                                                          |
| 24–35                   | Ref                                                      | Ref                                                      |
| 36–50                   | NA                                                       | 0.52, 0.07–3.96                                          |
| 51–67                   | NA                                                       | 0.24, 0.02–3.52                                          |
| Sex                     |                                                          |                                                          |
| Male                    | Ref                                                      | Ref                                                      |
| Female                  | 1.68, 0.28–10.1                                          | 5.15, 0.60–44.3                                          |
| Job                     |                                                          |                                                          |
| Medical doctor          | Ref                                                      | Ref                                                      |
| Nurse                   | 0.60, 0.07–4.90                                          | 0.33, 0.03–3.27                                          |
| Healthcare assistant    | 0.59, 0.05–7.61                                          | 2.08, 0.22–19.8                                          |
| Medical technician      | 0.58, 0.04–7.47                                          | NA                                                       |
| <b>Chronic diseases</b> |                                                          |                                                          |
| Age (years)             |                                                          |                                                          |
| 24–35                   | Ref                                                      | Ref                                                      |
| 36–50                   | NA                                                       | 1.16, 0.01–5.02                                          |
| 51–67                   | NA                                                       | 0.12, 0.01–4.17                                          |
| Sex                     |                                                          |                                                          |
| Male                    | Ref                                                      | Ref                                                      |
| Female                  | NA                                                       | NA                                                       |
| Job                     |                                                          |                                                          |
| Medical doctor          | Ref                                                      | Ref                                                      |
| Nurse                   | 0.75, 0.04–14.6                                          | NA                                                       |

|                                          |                 |                 |
|------------------------------------------|-----------------|-----------------|
| Healthcare assistant                     | 4.00, 0.25–63.9 | NA              |
| Medical technician                       | 2.00, 0.09–44.5 | NA              |
| <b>Use of medications or supplements</b> |                 |                 |
| Age (years)                              |                 |                 |
| 24–35                                    | Ref             | Ref             |
| 36–50                                    | 0.44, 0.05–3.63 | 3.10, 0.22–43.7 |
| 51–67                                    | 0.96, 0.13–6.97 | 1.78, 0.08–41.2 |
| Sex                                      |                 |                 |
| Male                                     | Ref             | Ref             |
| Female                                   | 2.93, 0.55–15.7 | 0.75, 0.10–5.71 |
| Job                                      |                 |                 |
| Medical doctor                           | Ref             | Ref             |
| Nurse                                    | 2.29, 0.31–16.7 | 0.45, 0.03–5.95 |
| Healthcare assistant                     | 7.50, 0.82–68.6 | 1.02, 0.07–15.7 |
| Medical technician                       | NA              | NA              |

OR, odds ratio, adjusted for sex, age and job category. CI, confidence interval. Ref, reference category. NA, not applicable.

**Supplementary S3.** Odds ratios for discordance in reporting between COVID-19 and 2019 flu questionnaires (reference category: concordant reports).

| Characteristics                           | Positive at COVID-19, Negative at 2019 Flu<br>OR, 95% CI | Negative at COVID-19, Positive at 2019<br>Flu<br>OR, 95% CI |
|-------------------------------------------|----------------------------------------------------------|-------------------------------------------------------------|
| <b>Allergies</b>                          |                                                          |                                                             |
| Age (years)                               |                                                          |                                                             |
| 24–35                                     | Ref                                                      | Ref                                                         |
| 36–50                                     | NA                                                       | 1.17, 0.28–4.90                                             |
| 51–67                                     | NA                                                       | 0.22, 0.02–2.27                                             |
| Sex                                       |                                                          |                                                             |
| Male                                      | Ref                                                      | Ref                                                         |
| Female                                    | 2.02, 0.44–9.36                                          | 2.27, 0.57–9.03                                             |
| Job                                       |                                                          |                                                             |
| Medical doctor                            | Ref                                                      | Ref                                                         |
| Nurse                                     | 4.58, 0.48–43.42                                         | 0.85, 0.18–3.95                                             |
| Healthcare assistant                      | 31, 1.80–29.6                                            | 1.42, .20–10.1                                              |
| Medical technician                        | NA                                                       | 0.05–5.44                                                   |
| <b>Chronic diseases</b>                   |                                                          |                                                             |
| Age (years)                               |                                                          |                                                             |
| 24–35                                     | Ref                                                      | Ref                                                         |
| 36–50                                     | 3.52, 0.78–15.9                                          | NA                                                          |
| 51–67                                     | 1.89, 0.34–10.7                                          | NA                                                          |
| Sex                                       |                                                          |                                                             |
| Male                                      | Ref                                                      | Ref                                                         |
| Female                                    | 2.37, 0.70–8.04                                          | 1.40, 0.11–17.3                                             |
| Job                                       |                                                          |                                                             |
| Medical doctor                            | Ref                                                      | Ref                                                         |
| Nurse                                     | 0.91, 0.22–3.74                                          | NA                                                          |
| Healthcare assistant                      | 1.00, 0.18–5.45                                          | NA                                                          |
| Medical technician                        | 0.72, 0.11–4.59                                          | NA                                                          |
| <b>Use of medications or supplements*</b> |                                                          |                                                             |
| Age (years)                               |                                                          |                                                             |
| 24–35                                     | Ref                                                      | Ref                                                         |
| 36–50                                     | 0.87, 0.30–2.50                                          | NA                                                          |
| 51–67                                     | 1.18, 0.38–3.70                                          | NA                                                          |
| Sex                                       |                                                          |                                                             |
| Male                                      | Ref                                                      | Ref                                                         |
| Female                                    | 6.69, 2.51–17.8                                          | NA                                                          |

---

| Job                  | Ref             | Ref |
|----------------------|-----------------|-----|
| Medical doctor       |                 |     |
| Nurse                | 1.53, 0.54–4.36 | NA  |
| Healthcare assistant | 1.56, 0.41–5.96 | NA  |
| Medical technician   | 1.13, 0.29–4.47 | NA  |

---

OR, odds ratio, adjusted for sex, age and job category. CI, confidence interval. Ref, reference category. NA, not applicable.

\* For medications or supplements use, no subject reported positive answer in the 2019 flu questionnaire without reporting it in the COVID–19 one. .
